# Table of Contents

## FEATURES

### *Approaches to Biology Teaching and Learning*

#### **Cultural Competence in the College Biology Classroom**

Kimberly Tanner and Deborah Allen .....251–258

### *Current Insights*

#### **Recent Research in Science Teaching and Learning**

Erin Dolan .....259

### *From the National Academies*

#### **Metagenomics: A Call for Bringing a New Science into the Classroom (While It's Still New)**

Anne Jurkowski, Ann H. Reid, and Jay B. Labov .....260–265

### *WWW.Life Sciences Education*

#### **Realms of the Viruses Online**

Dennis Liu .....266–270

### *Book Review*

#### **A Manual for the Scientific (Teaching) Revolution**

Mary Pat Wenderoth .....271–272

### *Book Review*

#### **Forgotten Classic Holds Treasure for Today's Lab**

Karen Kalumuck and Katie Ward .....273–274

### *Educator Highlight*

#### **H. Craig Heller**

Laura L. Mays Hoopes .....275–276

### *Meeting Report*

#### **Building, Using, and Maximizing the Impact of Concept Inventories in the Biological Sciences: Report on a National Science Foundation–sponsored Conference on the Construction of Concept Inventories in the Biological Sciences**

Kathy Garvin-Doxas, Michael Klymkowsky, and Susan Elrod .....277–282

## LETTER TO THE EDITOR

#### **Stem Cell Biology Should Be Taught in High Schools**

Ugur Salli, Steven W. Long, William S. Carlsen, and Kent E. Vrana .....283–284

## ESSAY

#### **Keeping It Real: Substantive Learning on a Short Calendar**

C. Phoebe Lostroh .....285–288

#### **Grappling with the Literature of Education Research and Practice**

Erin L. Dolan .....289–296

## ARTICLES

#### **Undergraduate Research Experiences Support Science Career Decisions and Active Learning**

David Lopatto .....297–306

#### **Using *Saccharomyces cerevisiae* to Test the Mutagenicity of Household Compounds: An Open Ended Hypothesis-Driven Teaching Lab**

Pamela A. Marshall .....307–315

#### **Identifying Future Scientists: Predicting Persistence into Research Training**

Richard McGee and Jill L. Keller .....316–331

#### **A Semester-long Student-directed Research Project Involving Enzyme Immunoassay: Appropriate for Immunology, Endocrinology, or Neuroscience Courses**

Sharon Ramos Goyette and Jane DeLuca .....332–342

#### **A New Paradigm for Mentored Undergraduate Research in Molecular Microbiology**

Susan Carson .....343–349

#### **The Annotated Bibliography and Citation Behavior: Enhancing Student Scholarship in an Undergraduate Biology Course**

Molly R. Flaspohler, Erika M. Rux, and John A. Flaspohler .....350–360

### *On the Cover*

Many of *CBE-LSE*'s readers are practicing research scientists, dedicated to their teaching but unfamiliar with the broader education literature, and struggling to stay abreast of must reading in their research disciplines. All our readers are busy professionals, with limited time for library work. Keeping up with the education literature and the biology education literature outside of *CBE-LSE* can be a challenge. On page 259 of this issue, we begin a new regular feature that should help. Edited by Erin Dolan and entitled "Current Insights: Recent Research in Science Teaching and Learning," this feature will highlight articles of likely interest to *CBE-LSE* readers that have appeared in other education journals, with brief commentaries. Dolan introduces it with an essay on page 289, which can serve readers as a guide to navigating the science education literature.

A second new feature that debuts in this issue is "Educator Highlights" on page 275, edited by Laura Mays Hoopes, which will profile life sciences educators who are making a difference.
